# Supplementary material for: Bacterial Lipodepsipeptides and Some of Their Derivatives and Cyclic Dipeptides as Potential Agents for Biocontrol of Pathogenic Bacteria and Fungi of Agrarian Plants
Source: PubMed Central journal article supplement (PMC9026286; doi:10.1021/acs.jafc.1c08139), 2022-04-08
Supplement: jf1c08139_si_001.pdf [file jf1c08139_si_001.pdf]

## Supporting Information

### **Bacterial Lipodepsipeptides, Some their Derivatives and Cyclic Dipeptides as Potential Agents to Biocontrol Pathogenic Bacteria and Fungi of Agrarian Plants**

Stefany Castaldi, Alessio Cimmino, Marco Masi, Antonio Evidente\*

#### **Index**

Figure S1.  $^1\text{H}$  NMR spectrum of tolaasin I in  $\text{CD}_3\text{OD}$  at 500 MHz

Figure S2.  $^1\text{H}$  NMR spectrum of hexacetyltolaasin I in  $\text{CD}_3\text{OD}$  at 500 MHz

Figure S3. ESIMS spectrum of hexacetyltolaasin I

Figure S4.  $^1\text{H}$  NMR spectrum of tetrahydrotolaasin I in  $\text{CD}_3\text{OD}$  at 500 MHz

Figure S5. ESIMS spectrum of tetrahydrotolaasin I

Figure S6.  $^1\text{H}$  NMR spectrum of WLIP in  $\text{CD}_3\text{OD}$  at 500 MHz

Figure S7.  $^1\text{H}$  NMR spectrum of WLIP methyl ester in  $\text{CD}_3\text{OD}$  at 500 MHz

Figure S8. ESIMS spectrum of WLIP methyl ester

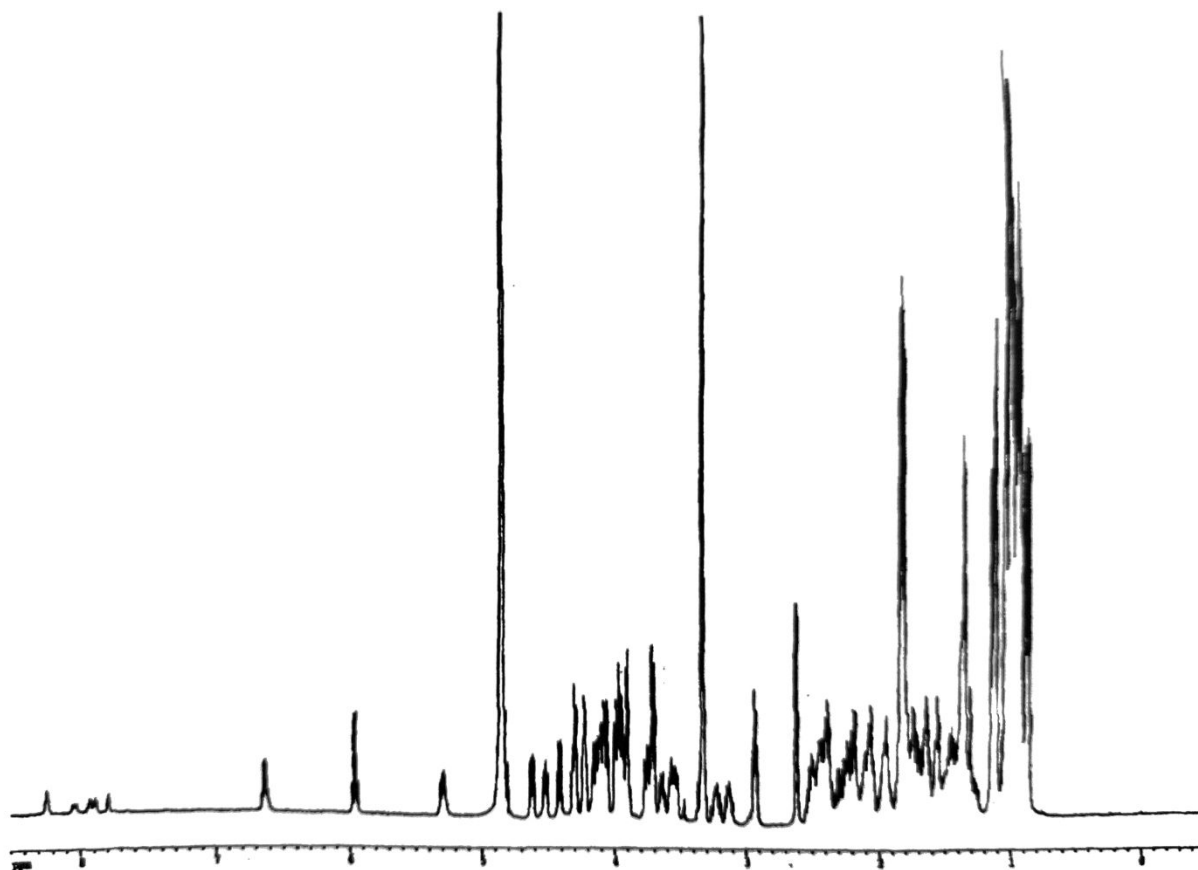

Figure S1. <sup>1</sup>H NMR spectrum of tolaasin I in CD<sub>3</sub>OD at 500 MHz.

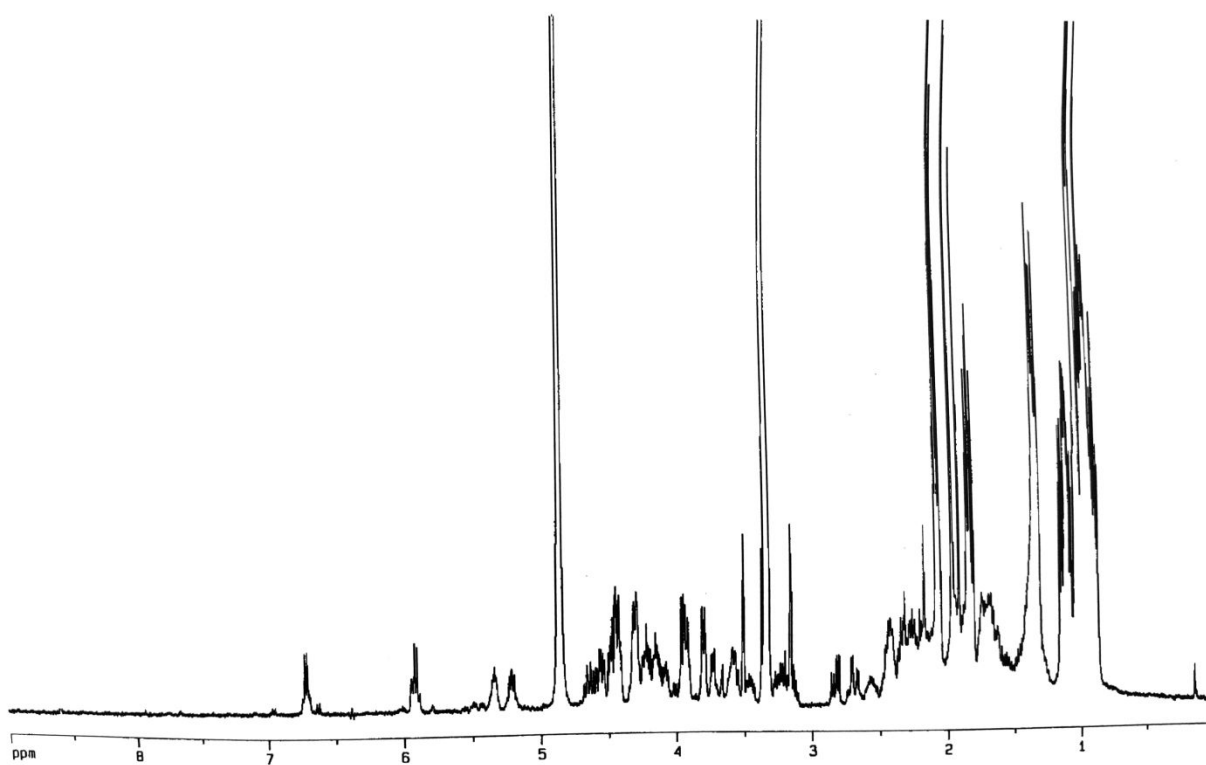

Figure S2. <sup>1</sup>H NMR spectrum of hexacetyltolaasin I in CD<sub>3</sub>OD at 500 MHz.

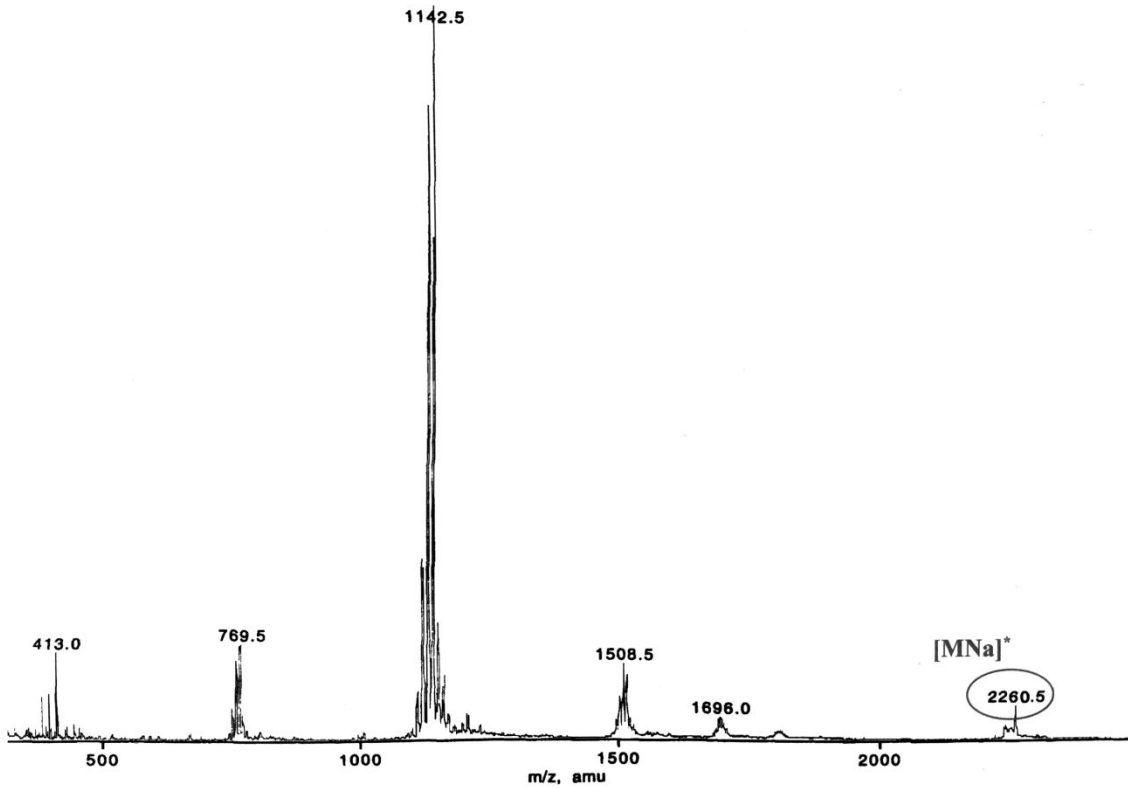

Figure S3. ESIMS spectrum of hexacetyltolaasin I.

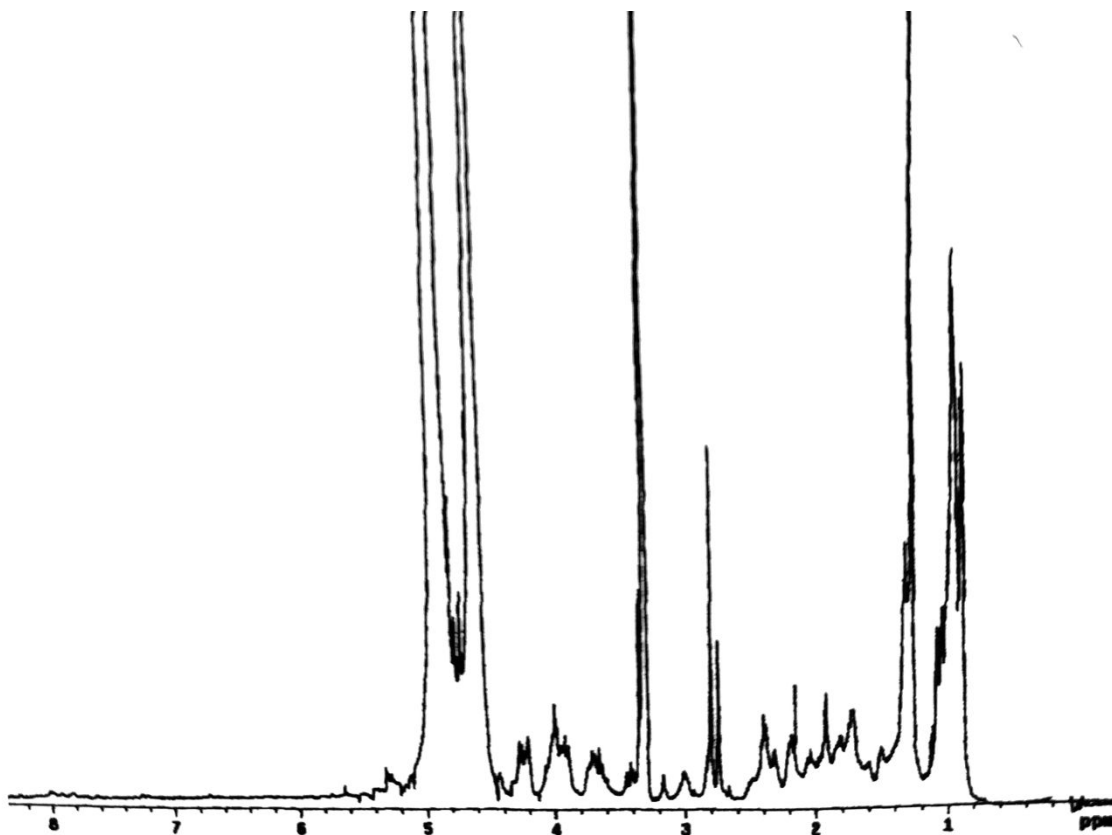

Figure S4. <sup>1</sup>H NMR spectrum of tetrahydrotolaasin I in CD<sub>3</sub>OD at 500 MHz.

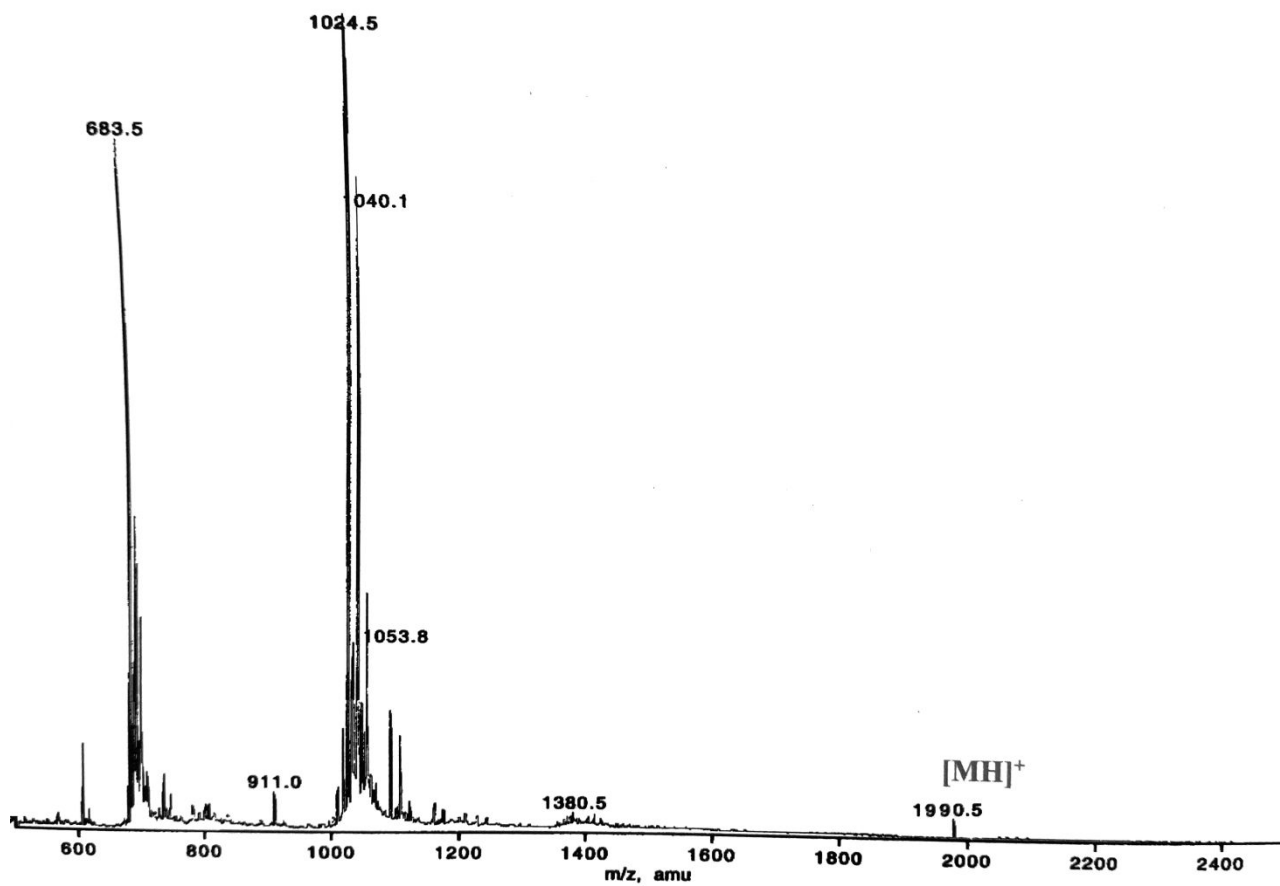

Figure S5. ESIMS spectrum of tetrahydrotolassin I.

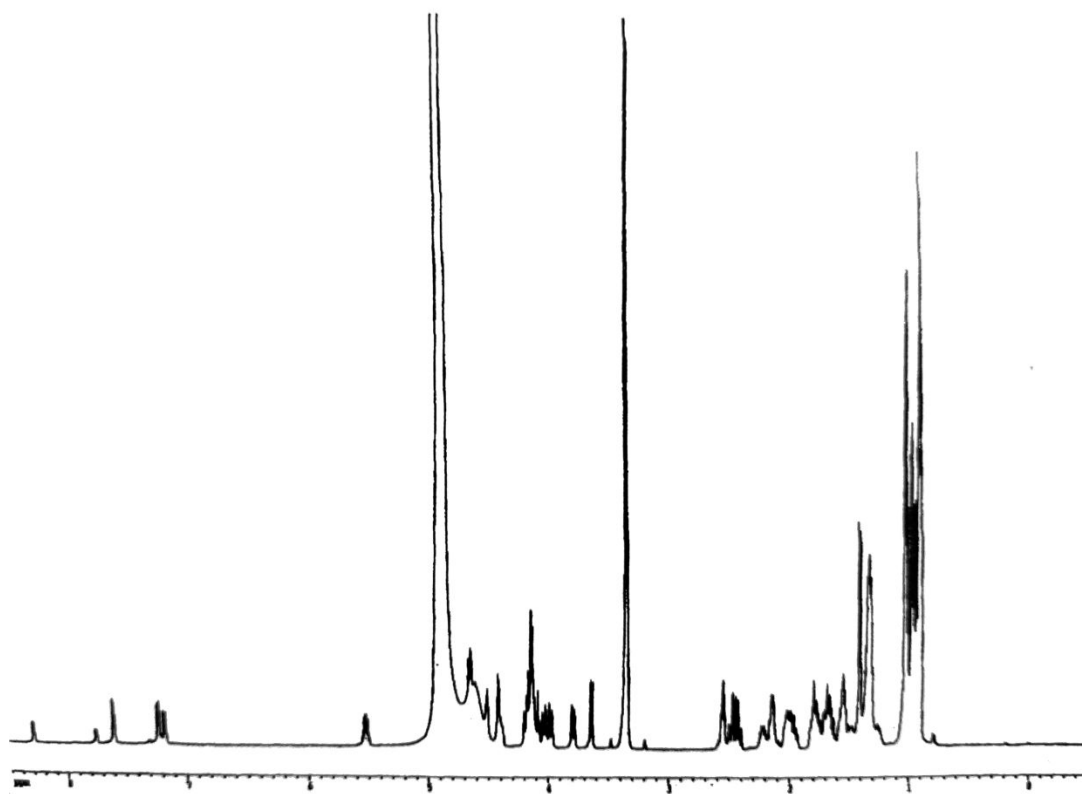

Figure S6.  $^1H$  NMR spectrum of WLIP in  $CD_3OD$  at 500 MHz.

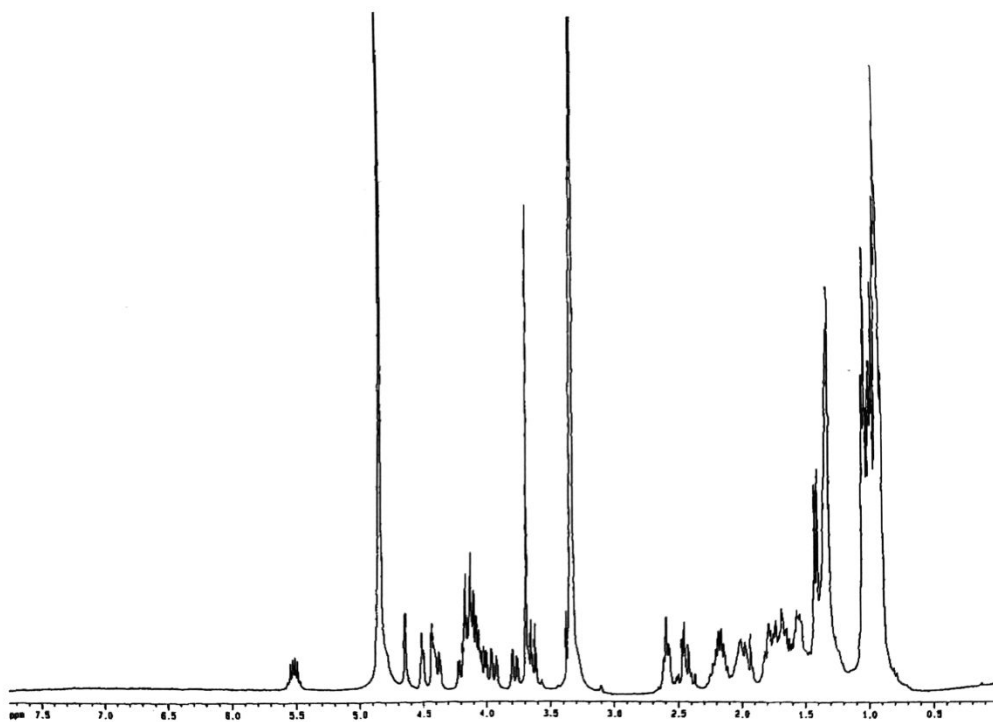

Figure S7.  $^1\text{H}$  NMR spectrum of WLIP methyl ester in  $\text{CD}_3\text{OD}$  at 500 MHz.

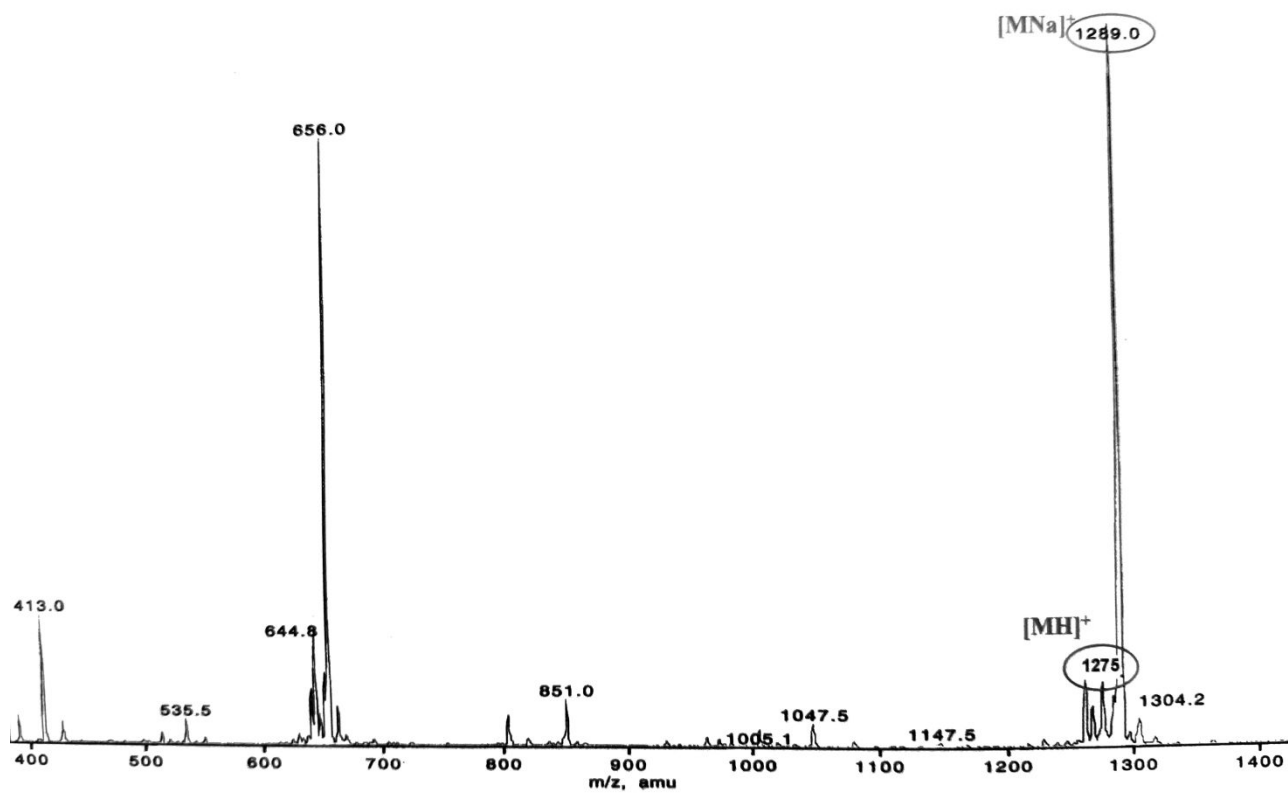

Figure S8. ESIMS spectrum of WLIP methyl ester.
